# Supplementary material for: Ligation of Macrophage Fcγ Receptors Recapitulates the Gene Expression Pattern of Vulnerable Human Carotid Plaques
Source: PLoS One. 2011 Jul 21;6(7):e21803. doi: 10.1371/journal.pone.0021803 (PMC3140977; doi:10.1371/journal.pone.0021803)
Supplement: Table S1 — Sequence of qRT-PCR primers used in these studies. (DOC) [file pone.0021803.s001.doc]

**Table S1. qPCR Primers**

| **GENE** | **SEQ** | **PRIMER SEQUENCE 5’ TO 3’** |
| --- | --- | --- |
| **-actin** | Forward | TACCTCATGAAGATCCTCACC |
| Reverse | TTTCGTGGATGCCACAGGAC |
|  | | |
| **MMP-1** | Forward | TGCAACTCTGACGTTGATCCCA |
| Reverse | cggcaaagactcatgtctcctgTc |
|  | | |
| **MMP-8** | Forward | AACCCCAGGTACCCATGAATGT |
| Reverse | CCCACCCTAATTCAGTGTGATCTC |
|  | | |
| **MMP-9** | Forward | AGGAGCCAGTTTGCCGGAT |
| Reverse | AGGTGAGAAGAGAGGGCCCA |
|  | | |
| **MMP-12** | Forward | AGTTACCTTCAAAGGCCAAGAG |
| Reverse | TCCAAGGATGTTAGGAAGCAAC |
|  | | |
| **TIMP-1** | Forward | GTCATCAGGGCCAAGTTCG |
| Reverse | TGAGAAACTCCTCGCTGCG |
|  | | |
| **TIMP-2** | Forward | AAGCGGTCAGTGAGAAGGAAG |
| Reverse | CACACACTACCGAGGAGGG |
|  | | |
| **TIMP-3** | Forward | TGCAACTTCGTGGAGAGGTG |
| Reverse | CACAAAGCAAGGCAGGTAGTA |
|  | | |
| **TIMP-4** | Forward | AGTATCTCTTGACTGGTCAGGTC |
| Reverse | GCAGCCACAGTTCAGATGGTA |
|  | | |
| **FcRI** | Forward | ATGTGGTTCTTGACAACTCTG |
| Reverse | GTAGCTGGGGGTCGAGGT |
|  | | |
| **FcRIIa** | Forward | ATGACTATGGAGACCCAAATG |
| Reverse | ATTGTGGAACCACTGAATGGA |
|  | | |
| **FcRIIb** | Forward | CTCTCCCAGGATACCCTGAGT |
| Reverse | GGTGCATGAGAAGTGAATAGGTG |
|  | | |
| **FcRIII** | Forward | ATGTGGCAGCTGCTCCTC |
| Reverse | CGAGGCCTGGCTTGAGAT |
|  | | |
| **uPA** | Forward | TTCGGAGGGCAGCACTGTGA |
| Reverse | ATGTTTCCCCAGGCCCAGCT |
|  | | |
| **uPAR** | Forward | GGGGATTGCCGTGTGGAAGA |
| Reverse | ATTGATTCATGGGGCCTCGG |
| **GENE** | **SEQ** | **PRIMER SEQUENCE 5’ TO 3’** |
| **PKC** | Forward | ATGGCGCCGTTCCTGCGC |
| Reverse | TAGCACAATCTGGATGACGC |
|  | | |
| **gp91Phox** | Forward | CTGGTTTGGCTGGGGTTG |
| Reverse | CCTGAGGAAGGACAGCAG |
|  | | |
| **-Actin** | Forward | GGCTTTGCTGGGGACGAT |
| Reverse | AGGGGCAACACGAAGCTC |
|  | | |
| **CD68** | Forward | GCTGTGCTTTTCTCGGGG |
| Reverse | AGTGGCAGTCGTGGGTCC |
|  | | |
| **TNF-** | Forward | TCTCGAACCCCGAGTGAC |
| Reverse | GGCAGCCTTGGCCCTTGA |
|  | | |
| **iNOS** | Forward | ACCTTCAGTATCACAACCTCA |
| Reverse | GACCTGCAAGTTAAAATCCCT |
|  | | |
| **SR-A1** | Forward | CGGGAAAAGGAAATGACAGCG |
| Reverse | ATT GCA TTC CCA TGT CCC TGG |
|  | | |
| **MHC II** | Forward | GACCAATCAGGCGAGTTTATGT |
| Reverse | TGAGCACAGTTACCTCTGGAG |
